# Supplementary material
Source: PubMed Central journal article supplement (PMC2945707)
Supplement: NIHMS182875-supplement-01.pdf [file NIHMS182875-supplement-01.pdf]

**Supplemental Table 1. Histopathologic analysis of livers after partial hepatectomy**

| Morphology                                                                                                            | No of cases/total <sup>1</sup><br>(% total) | Genotype <sup>2</sup> | No of cases | Gender | No of cases |
|-----------------------------------------------------------------------------------------------------------------------|---------------------------------------------|-----------------------|-------------|--------|-------------|
| Good histopathological outcome (absence of necrosis or focal necrosis in less than 25% of areas examined)             | 34/61<br>(55.7%)                            | single Tg             | 16          | male   | 11          |
|                                                                                                                       |                                             |                       |             | female | 5           |
|                                                                                                                       |                                             | double Tg             | 18          | male   | 5           |
|                                                                                                                       |                                             |                       |             | female | 13          |
| Bad histopathological outcome (severe necrosis in more than 50% of areas examined with marked hepatocyte vacuolation) | 27/61<br>(44.3%)                            | single Tg             | 13          | male   | 5           |
|                                                                                                                       |                                             |                       |             | female | 8           |
|                                                                                                                       |                                             | double Tg             | 14          | male   | 8           |
|                                                                                                                       |                                             |                       |             | female | 6           |

<sup>1</sup>A total of 61 mice went through partial hepatectomy procedure.

<sup>2</sup>Genotype designations: Single Tg, *Sod2*-TRE-*LacZ* single transgenic mice; double Tg, *Sod2*-TRE-*LacZ*/LAP-tTA double transgenic mice.

## Supplemental Figure 1

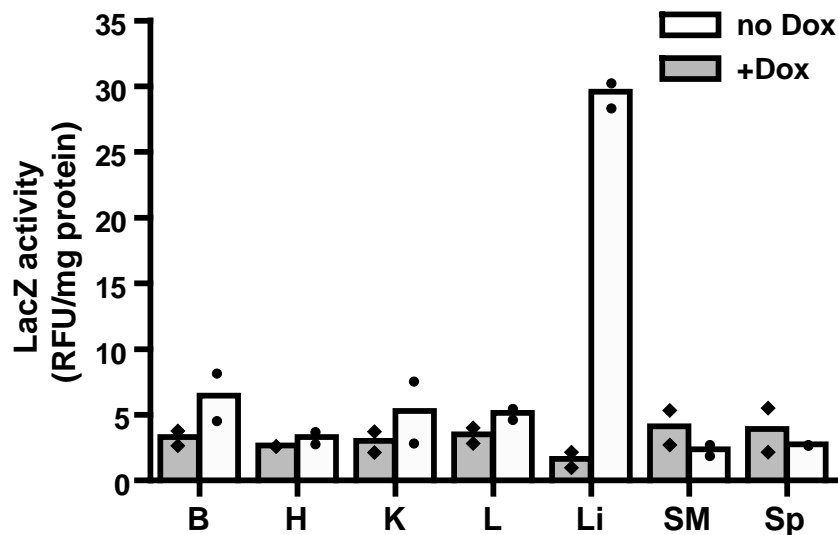

**Supplemental Figure 1** Liver-specific expression of LacZ and MnSOD from *Sod2*-TRE-*LacZ*/LAP-tTA double transgenic mice. LacZ expression in various tissues from *Sod2*-TRE-*Sod2*/LAP-tTA (Tet-Off) double transgenic mice treated with (+Dox) or without (no Dox) Dox-supplemented mouse chow is shown. B, brain; H, heart, K, kidney; L, lung; Li, liver; SM, skeletal muscle; Sp, spleen. Columns represent data from the average of two mice each; the individual values making up those averages are shown as black diamonds. Relative fluorescence unit (RFU) per mg total protein is shown as a function of LacZ activity.

### **LacZ ( $\beta$ -galactosidase) staining and activity measurement**

To stain for LacZ activity in the liver and other tissues, organs were retrieved from deeply anesthetized double transgenic mice, sliced at 1 mm thickness with a tissue slicer, and fixed in 4% paraformaldehyde in PBS (pH 7.2) for 1 hour at 4°C. After washing 3 times in PBS, fixed tissues were incubated in the staining solution (5 mM  $K_3Fe(CN)_6$ , 5 mM  $K_4Fe(CN)_6$ , 2 mM  $MgCl_2$ , 1 mg/ml X-gal in PBS, pH 7.2) at 37°C overnight. Stained tissues were post-fixed in 10% neutral buffered formalin and stored at 4°C.

To measure  $\beta$ -galactosidase activity in tissue lysates, tissues were diced into small pieces, homogenized on ice in 50 mM phosphate buffer (pH 7.8), sonicated (3x 5 sec each with a 5 sec pause on ice in between), and freeze/thawed three times in liquid nitrogen. Tissue lysates were then centrifuged at 10,000 g for 5 minutes at 4°C, and the supernatants aliquoted and stored at -80°C.  $\beta$ -galactosidase activities in tissue lysates were measured using a  $\beta$ -galactosidase enzyme assay system (Promega, USA) and were standardized over protein concentrations measured by Bradford method (Bio-Rad, USA).

**Supplemental Figure 2**

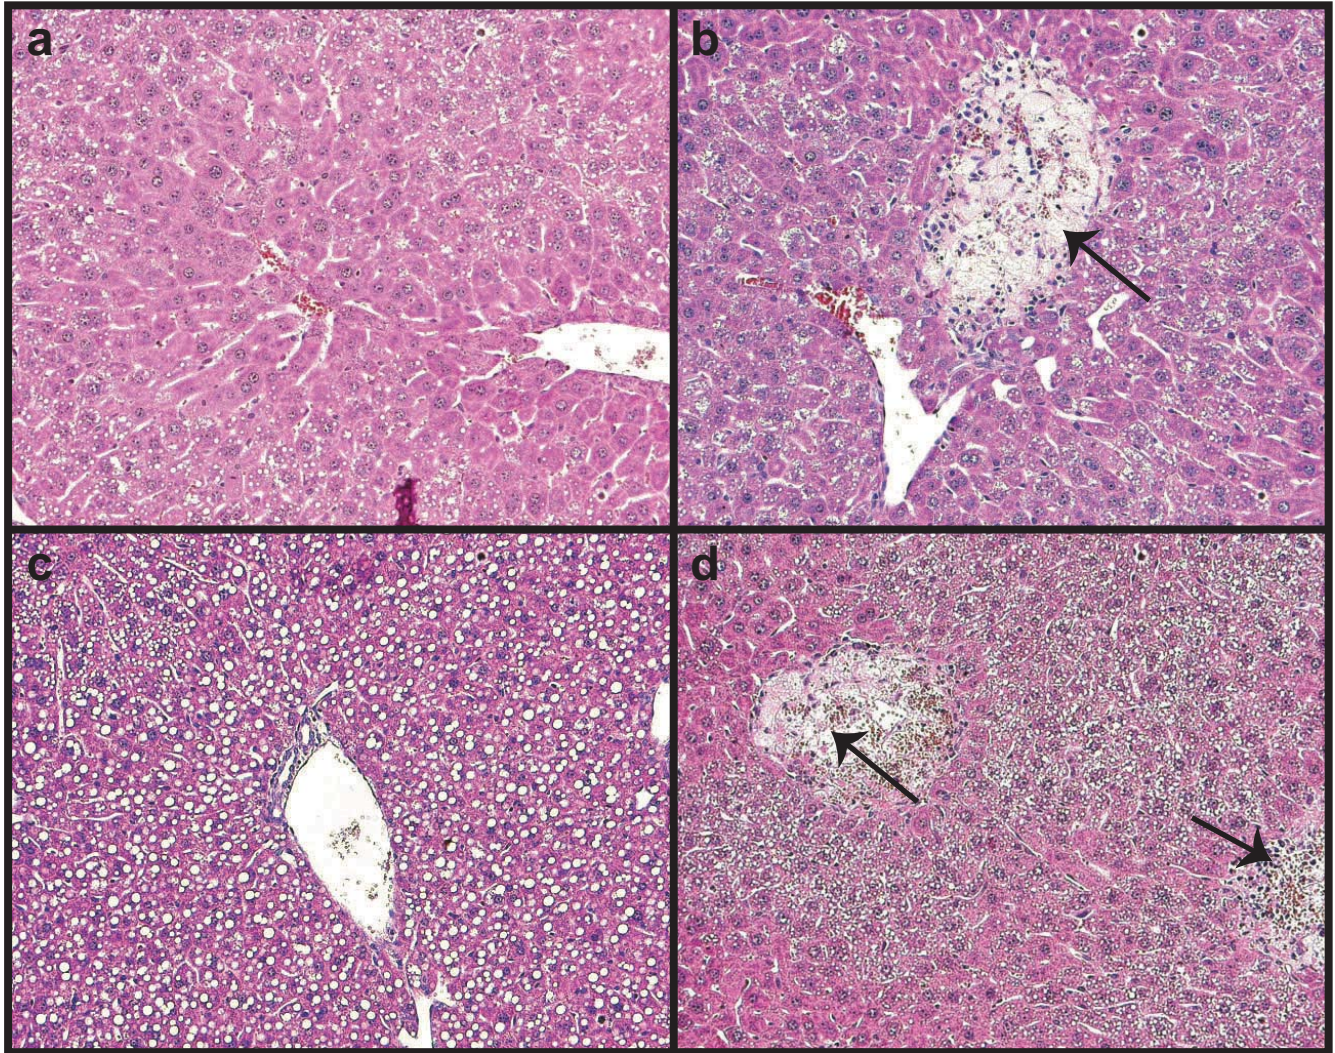

**Supplemental Figure 2** Representative histologic findings in mouse livers after partial hepatectomy showing a: healthy outcome with intact hepatocytes and normal lobular structure, b: a focal necrotic area (arrow), c: accumulation of large lipid vacuoles in hepatocytes, d: foci of necrosis (arrows) and hepatocyte microvacuolation. H & E staining ; original images taken at 200x magnification.
